# Supplementary material for: Estimating the atmospheric concentration of Criegee intermediates and their possible interference in a FAGE-LIF instrument
Source: Copernicus journal article supplement (doi:10.5194/acp-17-7807-2017), 2017-06-29
Supplement: Supplementary file 1 [file acp-17-7807-2017-supplement.pdf]

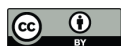

*Supplement of*

## **Estimating the atmospheric concentration of Criegee intermediates and their possible interference in a FAGE-LIF instrument**

**Anna Novelli et al.**

*Correspondence to:* Hartwig Harder ([hartwig.harder@mpic.de](mailto:hartwig.harder@mpic.de))

The copyright of individual parts of the supplement might differ from the CC BY 3.0 License.

1

## 2 **Assessment of the available rate coefficients for the SCI + SO<sub>2</sub> reaction**

3 The disagreement between the rate coefficient for the SCI + SO<sub>2</sub> reaction obtained by  
4 Mauldin III et al. (2012) and Berndt et al. (2012),  $5.0 \times 10^{-13} \text{ cm}^3 \text{ molecule}^{-1} \text{ s}^{-1}$ , and the one  
5 obtained by a number of other groups (Welz et al., 2012; Taatjes et al., 2013; Liu et al.,  
6 2014b; Sheps et al., 2014; Stone et al., 2014; Chhantyal-Pun et al., 2015; Newland et al.,  
7 2015a; Newland et al., 2015b; Foreman et al., 2016; Zhu et al., 2016),  $3.3 \times 10^{-11} \text{ cm}^3 \text{ molecule}^{-1} \text{ s}^{-1}$ , is not straightforward to explain.

9 A first factor is that Mauldin III et al. (2012) and Berndt et al. (2012) measure the rate of  
10 formation of H<sub>2</sub>SO<sub>4</sub> rather than the loss of SCI by SO<sub>2</sub>. Theoretical and experimental results  
11 (Carlsson et al., 2012; Ahrens et al., 2014) indicate that SO<sub>3</sub> is the main product of the SCI +  
12 SO<sub>2</sub> reaction, with a yield near 100% at all reaction conditions considered. Barring secondary  
13 chemistry removing SO<sub>3</sub> prior to its reaction with H<sub>2</sub>O to form H<sub>2</sub>SO<sub>4</sub>, which seems unlikely  
14 under their reaction conditions, the H<sub>2</sub>O<sub>4</sub> yield should match the SCI loss. Earlier theoretical  
15 work by Vereecken et al. (2012) suggested that the secondary ozonide (SOZ) formed as an  
16 intermediate from the reaction between larger SCI and SO<sub>2</sub> could stabilize and undergo  
17 bimolecular reaction without formation of SO<sub>3</sub>; the loss of SOZ would then reduce SO<sub>3</sub>  
18 formation, explaining the difference in the rate coefficients for the different experiments.  
19 However, more recent theoretical work (Kuwata et al., 2015) found additional low-lying  
20 pathways that make collisional stabilization of the SOZ unlikely. Experiments by Carlsson et  
21 al. (2012) and Ahrens et al. (2014) observed high yields of SO<sub>3</sub> close to unity suggesting that  
22 the SOZ is not lost under the conditions used, i.e. in chambers with high concentrations of  
23 reactants and in the absence of water.

1 A second factor is that the reaction conditions used by Mauldin III et al. (2012) and Berndt et  
2 al. (2014) differ from the other studies, i.e. they were performed either at ambient air  
3 conditions or with lower concentrations of reagents and in the presence of water, while the  
4 remaining experiments were typically performed under lower pressures, without efficient  
5 colliders present. The mechanism of the SCI+SO<sub>2</sub> reaction as obtained by several authors  
6 (Vereecken et al., 2012;Kuwata et al., 2015;Jiang et al., 2010;Kurtén et al., 2011) all indicate  
7 a barrierless formation of a pre-reactive complex or cycloadduct. This type of reactions  
8 typically show faster rate coefficients at higher pressures due to lower redissociation of the  
9 adduct; this is corroborated by the theoretical study on the pressure dependence by Kuwata et  
10 al. (2015) who finds no pressure dependence up to 10132.5 hPa and an increase in the  
11 effective rate coefficient for higher pressures. Experimental studies of the pressure  
12 dependence (Liu et al., 2014b;Huang et al., 2015;Chhantyal-Pun et al., 2016) do not show  
13 extensive pressure dependence up to 300 Torr, and all show a positive pressure dependence,  
14 in line with the currently accepted reaction mechanism. The Carlsson et al. (2012)  
15 experiments at 1013.51 hPa likewise can be fitted using a faster CI + SO<sub>2</sub> rate coefficient of  $1$   
16  $\times 10^{-11} \text{ cm}^3 \text{ molecule}^{-1} \text{ s}^{-1}$ . This suggests that the reaction conditions used by Mauldin III et al.  
17 and Berndt et al. would likely lead to faster rate coefficients, especially for larger SCI as used  
18 in Mauldin III et al. due to the lower redissociation rate and hence higher thermalization yield  
19 of the intermediates.

20 A third factor is that the Mauldin III et al. examine SCI formed from larger terpenoids, rather  
21 than the smaller SCI examined in the remaining studies. A larger SCI should mean a longer  
22 lifetime for the SOZ intermediate, especially as this longer lifetime makes collisional  
23 thermalization more efficient. Hence the large SOZ might indeed live long enough to react in  
24 bimolecular reactions prior to dissociation to SO<sub>3</sub>, contrary to smaller SOZ. Unfortunately,  
25 SOZ chemistry has not been studied in detail; for the current case the reaction with e.g. H<sub>2</sub>O

could be a potential loss process. A prerequisite for this scavenging to be effective is that no  $\text{H}_2\text{SO}_4$  precursor should be formed. This scavenging of the SOZ intermediate would however not apply to the experiments of Berndt et al., which examined  $\text{CH}_3\text{CHOO}$  and  $(\text{CH}_3)_2\text{COO}$  Criegee intermediates, similar in size to those used in the studies yielding higher rate coefficients. For SCI of this size, the RRKM master equation analysis of (Kuwata et al., 2015) predicts very fast SOZ decomposition.

Finally, an alternative explanation could be based on analysis of the studies by Mauldin III et al. (2012) and Berndt et al. (2012). In their experiments, the rate of the  $\text{SCI} + \text{SO}_2$  reaction is derived relative to the total loss rate of SCI,  $L_{\text{SCI}}$ , as it governs the steady-state concentration of SCI with negligible  $\text{SO}_2$  present. This  $L_{\text{SCI}}$  has a value on the order of  $\sim 3$  to  $5 \text{ s}^{-1}$  in both experiments. Since these studies, a large body of experimental and theoretical data has become available, regarding the reactivity of SCI towards many coreactants present in the reaction mixture (Taatjes et al., 2013; Ouyang et al., 2013; Ahrens et al., 2014; Buras et al., 2014; Liu et al., 2014a; Stone et al., 2014; Sheps et al., 2014; Welz et al., 2014; Lewis et al., 2015). From this new data, we should consider that a total loss rate of about  $4 \text{ s}^{-1}$  is an underestimate. In a previous study by Novelli et al. (2014) a value of  $L_{\text{SCI}} = 40 \text{ s}^{-1}$  under atmospheric conditions was proposed. A re-analysis of the study by Mauldin III et al. (2012) using  $L_{\text{SCI}} = 40 \text{ s}^{-1}$  and the measured yield of SCI for  $\alpha$ -pinene of 0.1 (Donahue et al., 2011), results in a rate coefficient for the  $\alpha$ -pinene-derived  $\text{SCI} + \text{SO}_2$  reaction of  $2.6 \times 10^{-11} \text{ cm}^3 \text{ molecule}^{-1} \text{ s}^{-1}$ . Likewise, for the other compounds examined in the two studies (Berndt et al., 2012; Mauldin III et al., 2012), the derived rate of  $\text{SCI} + \text{SO}_2$  would shift significantly towards the higher values obtained in the other studies (Welz et al., 2012; Taatjes et al., 2013; Liu et al., 2014b; Sheps et al., 2014; Stone et al., 2014). One must consider, though, that the study by Berndt et al. (2012) included a measurement of  $k_{\text{loss}}$ , based on the observed  $\text{H}_2\text{SO}_4$  formation from the steady state SCI in the absence of  $\text{SO}_2$ . Hence, this second explanation is only viable

1 if another source of  $\text{H}_2\text{SO}_4$  exists in the system; this has already been suggested by Newland  
2 et al. (2015a) based on their  $\text{SO}_2$  oxidation experiments.

3 Still, as these considerations for the lower values by Mauldin III et al. (2012) and Berndt et al.  
4 (2012) are merely speculative, we will consider both  $3.3 \times 10^{-11} \text{ cm}^3 \text{ molecule}^{-1} \text{ s}^{-1}$  and  $5 \times 10^{-13}$   
5  $\text{ cm}^3 \text{ molecule}^{-1} \text{ s}^{-1}$  as possible rate coefficients for the  $\text{SCI} + \text{SO}_2$  reaction in the current  
6 budget analysis.

### 7 **SCI time series**

9 Time series of SCI were derived for two field campaigns, HUMPPA-COPEC 2010 and HOPE  
10 2012, obtained based on different source data, i.e. the sulfuric acid budget, the speciated VOC  
11 concentrations measured, and the unexplained OH reactivity.

12 The time series for the HUMPPA-COPEC 2010 campaign (Figures SI-2, SI-4, and SI-7) are  
13 fairly well defined, at least in view of intrinsic uncertainty of the underlying data; as detailed  
14 in the main text, this is the campaign with the highest expected SCI concentrations. Fig SI-2,  
15 using the  $\text{H}_2\text{SO}_4$  budget as data source, shows a less pronounced diurnal cycle, but figure SI-4  
16 and SI-7 both show a clear diurnal cycle of the predicted SCI concentration, as well as some  
17 daily differences. These plots both link [SCI] to VOC concentrations, and the SCI  
18 concentration follows the diel variation of these VOCs, as expected from the ozonolysis  
19 chemistry as a source of SCI. Our analysis is not able to account for different yields or  
20 lifetimes of SCI as a function of VOC speciation differences from day to night, due to lack of  
21 data. In principle this could superimpose an additional SCI concentration diel variation, but  
22 we anticipate this to be minor considering that the VOC speciation does not change drastically  
23 between day and night. Both plots also show clear daily differences.

1 The [SCI] time series for the HOPE 2012 campaign are characterized mostly by their  
2 statistical noise. As discussed in the main paper, the SCI concentration during this campaign  
3 was expected to be low, and the SCI concentration estimates are typically derived from a  
4 small difference between large numbers, each with their own statistical noise, leading to  
5 highly variable data with very large relative uncertainties even when the absolute numbers  
6 remain small. Under these conditions, neither diurnal cycles, day-to-day variations, nor even  
7 minimum and peak values carry strong significance, and no meaningful in-depth analysis can  
8 be done beyond stating that the concentrations are predicted to be low indeed.

9 Across all SCI time series, we find that the minimum and maximum values of the predicted  
10 SCI concentration remains within a relatively modest factor of the median and the average  
11 [SCI], only exceeding a factor of 5 for a handful of data points. Considering the uncertainties  
12 already incurred through the analysis methodology itself, and the variability and uncertainties  
13 on the source data underlying these studies, secondary effects such as day-to-day variability,  
14 diurnal cycles, or multi-day variations have only a moderate to small impact on the overall  
15 uncertainty of the CI estimates proposed in the main paper, where we indicate uncertainties  
16 that exceed an order of magnitude.

#### 18 **Sensitivity study on the unexplained OH reactivity SCI estimate**

19 The estimate of SCI from the unexplained OH reactivity data contains larger uncertainties  
20 compared to the previous estimates as the rate coefficient for ozonolysis of unsaturated  
21 compounds varies by up to three orders of magnitude. In addition, the rate coefficient between  
22 OH and unsaturated compounds, depending on whether these are unsaturated NMHC or  
23 OVOC, primary emissions, or secondary oxidation products, varies by an order of magnitude.  
24 A sensitivity study was done on the SCI estimates from the unexplained OH reactivity to

attempt to account for this uncertainty in rate coefficients. It is possible to calculate a lower limit for the SCI concentration by using the highest rate coefficient between OH and unsaturated compounds,  $1.0 \times 10^{-10} \text{ cm}^3 \text{ molecule}^{-1} \text{ s}^{-1}$  (Atkinson et al., 2006) combined with a slow rate coefficient for the unsaturated compounds and ozone,  $1.0 \times 10^{-17} \text{ cm}^3 \text{ molecule}^{-1} \text{ s}^{-1}$  (Atkinson et al., 2006), leading to a  $[\text{SCI}] = (8.7 \pm 8.0) \times 10^3 \text{ molecules cm}^{-3}$ . For the upper limit, a slower rate coefficient for OH and unsaturated OVOC,  $\sim 3.0 \times 10^{-11} \text{ cm}^3 \text{ molecule}^{-1} \text{ s}^{-1}$  (Atkinson et al., 2006; Teruel et al., 2006) together with a higher rate coefficient with  $\text{O}_3$ ,  $1.0 \times 10^{-16} \text{ cm}^3 \text{ molecule}^{-1} \text{ s}^{-1}$  (Atkinson et al., 2006) results in a concentration of  $[\text{SCI}] = (3.0 \pm 3.0) \times 10^5 \text{ molecules cm}^{-3}$ . These are the values obtained for the HUMPPA-COPEC 2010 campaign. For the HOPE 2012 campaign, the same assumptions would yield a lower and an upper limit of  $(1.0 \pm 0.2) \times 10^3 \text{ molecules cm}^{-3}$  and  $(2.9 \pm 0.7) \times 10^4 \text{ molecules cm}^{-3}$ , respectively.

Table SI-1. Average concentrations with  $1\sigma$  standard deviation of measured unsaturated VOC during the HUMPPA-COPEC 2010 and HOPE 2012 campaigns, together with the rate coefficients of the reaction with ozone (IUPAC recommended values) (Atkinson et al., 2006).

| Compound                             | [molecule cm <sup>-3</sup> ] |                             | Rate coefficient with O <sub>3</sub><br>[cm <sup>3</sup> molecule <sup>-1</sup> s <sup>-1</sup> ] |
|--------------------------------------|------------------------------|-----------------------------|---------------------------------------------------------------------------------------------------|
|                                      | HUMPPA-<br>COPEC 2010        | HOPE 2012                   |                                                                                                   |
| <b>isoprene</b>                      | $(1.8 \pm 1.8) \times 10^9$  | $(2.2 \pm 2.2) \times 10^9$ | $1.0 \times 10^{-14} \exp(-1995/T)$                                                               |
| <b><math>\alpha</math>-pinene</b>    | $(2.7 \pm 3.0) \times 10^9$  | $(1.5 \pm 1.5) \times 10^9$ | $8.1 \times 10^{-16} \exp(-640/T)$                                                                |
| <b><math>\beta</math>-pinene</b>     | $(1.9 \pm 6.6) \times 10^8$  | $(9.0 \pm 9.0) \times 10^8$ | $1.4 \times 10^{-15} \exp(-1270/T)$                                                               |
| <b>3-carene</b>                      | $(1.7 \pm 2.0) \times 10^9$  | $(5.6 \pm 4.7) \times 10^8$ | $4.8 \times 10^{-17, b}$                                                                          |
| <b>myrcene</b>                       | $(2.6 \pm 2.7) \times 10^8$  | $(2.2 \pm 1.6) \times 10^8$ | $2.7 \times 10^{-15} \exp(-520/T)$                                                                |
| <b>limonene</b>                      | n.a.                         | $(2.9 \pm 2.1) \times 10^8$ | $2.8 \times 10^{-15} \exp(-770/T)$                                                                |
| <b>sabinene</b>                      | n.a.                         | $(9.2 \pm 9.6) \times 10^8$ | $8.2 \times 10^{-17, b}$                                                                          |
| <b><math>\gamma</math>-terpinene</b> | n.a.                         | $(1.0 \pm 1.0) \times 10^8$ | $1.5 \times 10^{-16, b}$                                                                          |
| <b>2-methylpropene</b>               | n.a.                         | $(4.2 \pm 2.5) \times 10^8$ | $2.7 \times 10^{-15} \exp(-1630/T)$                                                               |
| <b>but-1-ene</b>                     | n.a.                         | $(1.4 \pm 4.2) \times 10^8$ | $1.2 \times 10^{-17, a, b}$                                                                       |
| <b>propene</b>                       | n.a.                         | $(4.7 \pm 3.7) \times 10^8$ | $5.5 \times 10^{-15} \exp(-1880/T)$                                                               |
| <b>cis-2-butene</b>                  | n.a.                         | $(6.1 \pm 3.0) \times 10^7$ | $3.2 \times 10^{-15} \exp(-965/T)$                                                                |
| <b>ethene</b>                        | n.a.                         | $(7.3 \pm 9.0) \times 10^9$ | $9.1 \times 10^{-15} \exp(-2580/T)$                                                               |

a, rate coefficient from Adeniji et al. (1981).

b, at 298 K

1 ppbv =  $2.46 \times 10^{10}$  molecules cm<sup>-3</sup> at 295K and 1013 hPa.



1 Table SI-2. Average concentrations with 1 $\sigma$  standard deviation of measured trace gas during  
2 the HUMPPA-COPEC 2010 and HOPE 2012 campaigns, with the rate coefficients of the  
3 reaction with OH (IUPAC recommended values) (Atkinson et al., 2006;Atkinson et al., 2004)

| Compound                             | [molecule cm <sup>-3</sup> ]       |                                    | Rate coefficient with OH<br>[cm <sup>3</sup> molecule <sup>-1</sup> s <sup>-1</sup> ] |
|--------------------------------------|------------------------------------|------------------------------------|---------------------------------------------------------------------------------------|
|                                      | HUMPPA-<br>COPEC 2010              | HOPE 2012                          |                                                                                       |
| <b>isoprene</b>                      | (1.8 $\pm$ 1.8) x 10 <sup>9</sup>  | (2.2 $\pm$ 2.0) x 10 <sup>9</sup>  | 2.7 x 10 <sup>-11</sup> exp(390/T)                                                    |
| <b><math>\alpha</math>-pinene</b>    | (2.7 $\pm$ 3.0) x 10 <sup>9</sup>  | (1.5 $\pm$ 1.5) x 10 <sup>9</sup>  | 1.2 x 10 <sup>-11</sup> exp(440/T)                                                    |
| <b><math>\beta</math>-pinene</b>     | (1.9 $\pm$ 6.6) x 10 <sup>8</sup>  | (9.0 $\pm$ 9.0) x 10 <sup>8</sup>  | 7.4 x 10 <sup>-11</sup> , a,b                                                         |
| <b>3-carene</b>                      | (1.7 $\pm$ 2.0) x 10 <sup>9</sup>  | (5.6 $\pm$ 4.7) x 10 <sup>8</sup>  | 8.8 x 10 <sup>-11</sup> , a,b                                                         |
| <b>myrcene</b>                       | (2.6 $\pm$ 2.7) x 10 <sup>8</sup>  | (2.2 $\pm$ 1.6) x 10 <sup>8</sup>  | 3.3 x 10 <sup>-10</sup> , b,c                                                         |
| <b>limonene</b>                      | n.a.                               | (2.9 $\pm$ 2.1) x 10 <sup>8</sup>  | 3 x 10 <sup>-11</sup> exp(515/T), <sup>d</sup>                                        |
| <b>sabinene</b>                      | n.a.                               | (9.2 $\pm$ 9.6) x 10 <sup>8</sup>  | 1.2 x 10 <sup>-10</sup> , a,b                                                         |
| <b><math>\gamma</math>-terpinene</b> | n.a.                               | (1.0 $\pm$ 1.0) x 10 <sup>8</sup>  | 1.7 x 10 <sup>-10</sup> , b                                                           |
| <b>MACR</b>                          | (1.0 $\pm$ 0.9) x 10 <sup>10</sup> | (1.4 $\pm$ 0.9) x 10 <sup>9</sup>  | 8 x 10 <sup>-12</sup> exp(380/T)                                                      |
| <b>ethanol</b>                       | (3.6 $\pm$ 2.2) x 10 <sup>10</sup> | (1.8 $\pm$ 1.1) x 10 <sup>10</sup> | 3.2 x 10 <sup>-12</sup> exp(20/T)                                                     |
| <b>methanol</b>                      | (1.0 $\pm$ 1.4) x 10 <sup>11</sup> | (9.0 $\pm$ 3.4) x 10 <sup>10</sup> | 9.0 x 10 <sup>-13</sup> , b                                                           |
| <b>ozone</b>                         | (1.1 $\pm$ 0.2) x 10 <sup>12</sup> | (1.1 $\pm$ 0.3) x 10 <sup>12</sup> | 1.7 x 10 <sup>-12</sup> exp(-940/T)                                                   |
| <b>SO<sub>2</sub></b>                | (1.4 $\pm$ 1.7) x 10 <sup>10</sup> | (2.3 $\pm$ 2.2) x 10 <sup>9</sup>  | 2.0 x 10 <sup>-12</sup> , b                                                           |
| <b>H<sub>2</sub>O<sub>2</sub></b>    | (1.1 $\pm$ 1.0) x 10 <sup>10</sup> | n.a.                               | 1.7 x 10 <sup>-12</sup> , b                                                           |
| <b>HO<sub>2</sub></b>                | (9.0 $\pm$ 9.5) x 10 <sup>8</sup>  | (1.4 $\pm$ 8.6) x 10 <sup>8</sup>  | 4.8 x 10 <sup>-11</sup> exp(250/T)                                                    |
| <b>NO</b>                            | (6.5 $\pm$ 7.0) x 10 <sup>8</sup>  | (3.8 $\pm$ 5.0) x 10 <sup>9</sup>  | 1.3 x 10 <sup>-11</sup> , b                                                           |
| <b>NO<sub>2</sub></b>                | (9.5 $\pm$ 5.0) x 10 <sup>9</sup>  | (3.8 $\pm$ 2.4) x 10 <sup>10</sup> | 1.1 x 10 <sup>-11</sup> , b                                                           |
| <b>CO</b>                            | (3.0 $\pm$ 1.2) x 10 <sup>12</sup> | (2.8 $\pm$ 0.4) x 10 <sup>12</sup> | 2.1 x 10 <sup>-13</sup> , b                                                           |
| <b>HONO</b>                          | (3.4 $\pm$ 3.1) x 10 <sup>9</sup>  | n.a.                               | 6.0 x 10 <sup>-12</sup> , b                                                           |
| <b>propanal</b>                      | n.a.                               | (5.8 $\pm$ 3.0) x 10 <sup>9</sup>  | 4.9 x 10 <sup>-12</sup> exp(405/T)                                                    |

|                        |                                 |                                |                                      |
|------------------------|---------------------------------|--------------------------------|--------------------------------------|
| <b>acetaldehyde</b>    | $(1.8 \pm 1.0) \times 10^{10}$  | $(2.9 \pm 1.4) \times 10^{10}$ | $1.5 \times 10^{-11, b}$             |
| <b>formaldehyde</b>    | $(1.4 \pm 1.6) \times 10^{10}$  | $(2.1 \pm 0.4) \times 10^{10}$ | $8.5 \times 10^{-12, b}$             |
| <b>acetone</b>         | $(8.2 \pm 3.8) \times 10^{10}$  | $(6.0 \pm 2.2) \times 10^{10}$ | $1.8 \times 10^{-13, b}$             |
| <b>CH<sub>4</sub></b>  | $(4.4 \pm 0.07) \times 10^{13}$ | $(4.3 \pm 0.1) \times 10^{13}$ | $6.4 \times 10^{-15, b}$             |
| <b>2-methylpropene</b> | n.a.                            | $(4.2 \pm 2.5) \times 10^8$    | $6.1 \times 10^{-11, a, b}$          |
| <b>but-1-ene</b>       | n.a.                            | $(1.4 \pm 4.2) \times 10^8$    | $3.1 \times 10^{-11, a, b}$          |
| <b>propene</b>         | n.a.                            | $(4.7 \pm 3.7) \times 10^8$    | $2.9 \times 10^{-11, b}$             |
| <b>cis-2-butene</b>    | n.a.                            | $(6.1 \pm 3.0) \times 10^7$    | $6.4 \times 10^{-11, b}$             |
| <b>ethene</b>          | n.a.                            | $(7.3 \pm 9.0) \times 10^9$    | $7.8 \times 10^{-12, b}$             |
| <b>p-xylene</b>        | n.a.                            | $(7.2 \pm 5.2) \times 10^8$    | $2.0 \times 10^{-11, a, b}$          |
| <b>benzene</b>         | $(2.1 \pm 1.9) \times 10^9$     | $(8.0 \pm 4.0) \times 10^8$    | $1.2 \times 10^{-12, a, b}$          |
| <b>ethylbenzene</b>    | n.a.                            | $(2.3 \pm 2.1) \times 10^8$    | $7.0 \times 10^{-12, a, b}$          |
| <b>Toluene</b>         | $(6.1 \pm 3.0) \times 10^9$     | $(1.2 \pm 0.7) \times 10^9$    | $5.6 \times 10^{-12, a, b}$          |
| <b>ethane</b>          | n.a.                            | $(1.8 \pm 0.3) \times 10^{10}$ | $4.8 \times 10^{-11} \exp(250/T),^a$ |
| <b>propane</b>         | n.a.                            | $(5.6 \pm 3.6) \times 10^9$    | $1.1 \times 10^{-12, a, b}$          |
| <b>methylpropane</b>   | $(1.8 \pm 2.3) \times 10^9$     | $(1.4 \pm 0.9) \times 10^9$    | $2.1 \times 10^{-12, a, b}$          |
| <b>butane</b>          | $(1.8 \pm 1.6) \times 10^9$     | $(2.0 \pm 1.2) \times 10^9$    | $2.3 \times 10^{-12, a, b}$          |
| <b>2-methylbutane</b>  | $(1.6 \pm 1.2) \times 10^9$     | n.a.                           | $3.6 \times 10^{-12, a, b}$          |
| <b>n-pentane</b>       | $(1.0 \pm 0.9) \times 10^9$     | $(5.6 \pm 5.0) \times 10^9$    | $3.8 \times 10^{-12, a, b}$          |

a, rate coefficient from (Atkinson and Arey, 2003).

b, at 298 K.

c, rate coefficient from (Hites and Turner, 2009)

d, rate coefficient from (Braure et al., 2014)

1 ppbv =  $2.46 \times 10^{10}$  molecules cm<sup>-3</sup> at 295K and 1013 hPa.

Table SI-3. Average sum of concentrations with 1 $\sigma$  standard deviation of BVOC (isoprene,  $\alpha$ -pinene,  $\beta$ -pinene, 3-carene, myrcene, limonene, sabinene,  $\gamma$ -terpinene) and temperature for the entire HOPE 2012 field campaign excluding the period between 26<sup>th</sup> to 28<sup>th</sup> of July 2012.

|                                                   | $\Sigma[\text{VOC}] [\text{molecules cm}^{-3}]$ | Temperature [ $^{\circ}\text{C}$ ] |
|---------------------------------------------------|-------------------------------------------------|------------------------------------|
| HOPE 2012 campaign                                | $(5.0 \pm 4.0) \times 10^9$                     | $16 \pm 3.0$                       |
| 26 <sup>th</sup> to 28 <sup>th</sup> of July 2012 | $(1.3 \pm 0.9) \times 10^{10}$                  | $22 \pm 3.0$                       |

1 ppbv =  $2.46 \times 10^{10}$  molecules  $\text{cm}^{-3}$  at 295K and 1013 hPa.

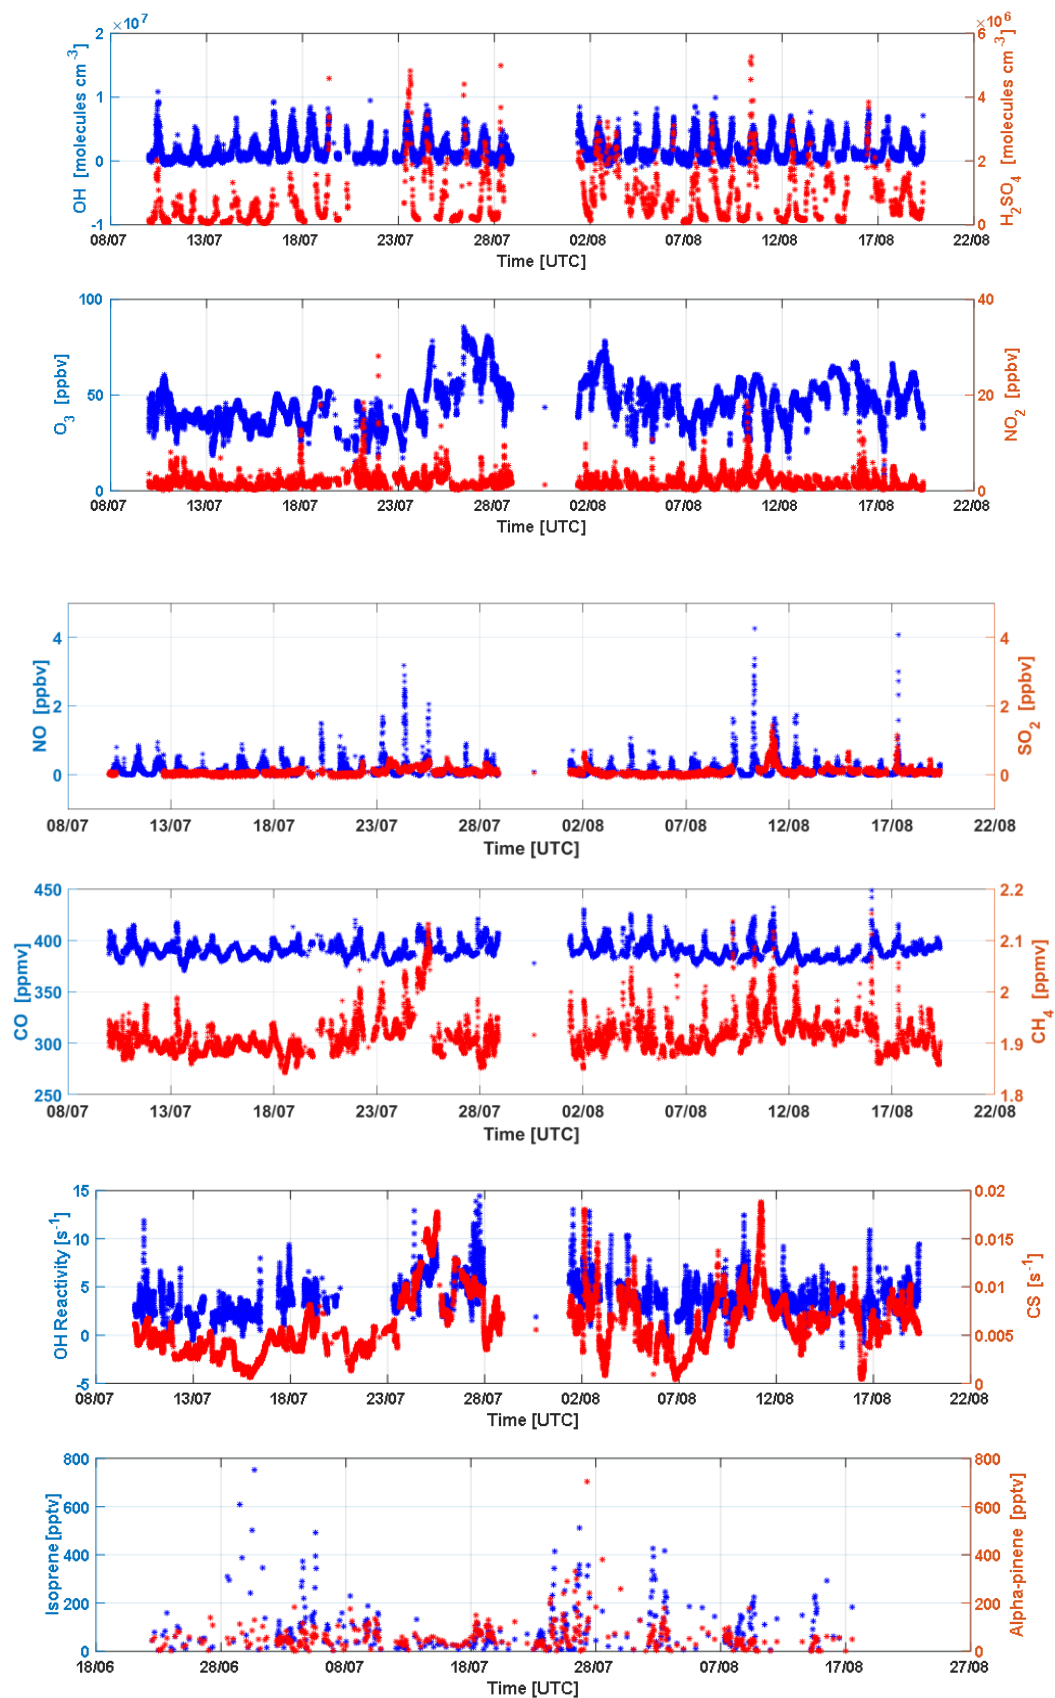

Figure SI-1. Time series of trace gases measured during the HOPE 2012 campaign.

1

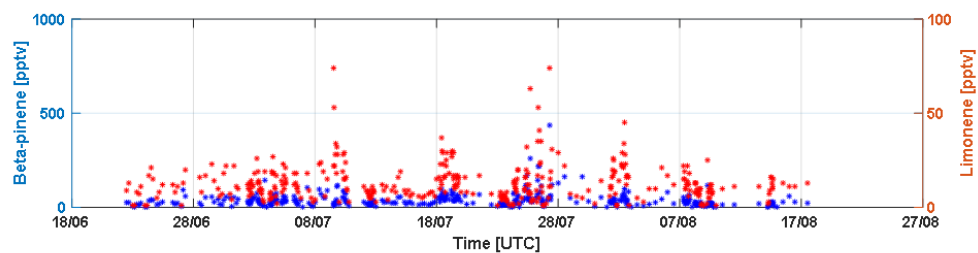

2

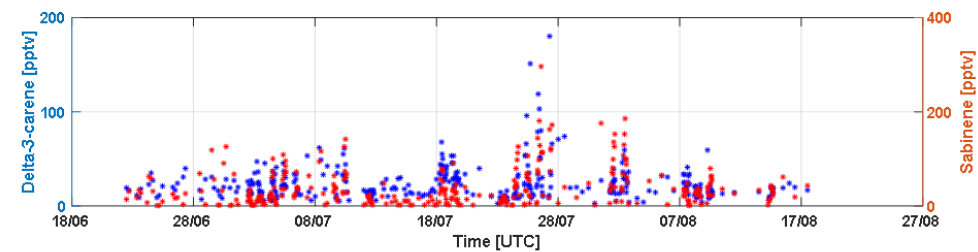

3

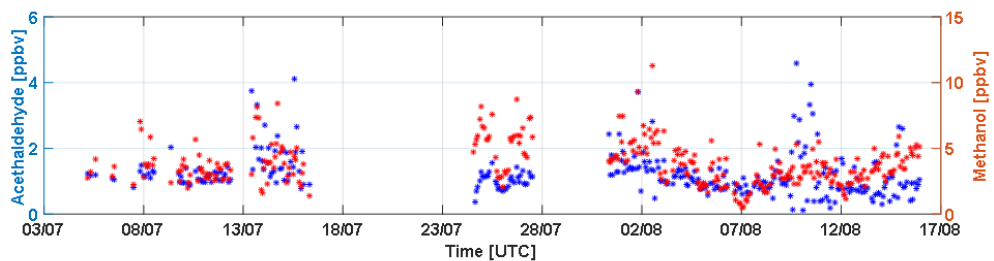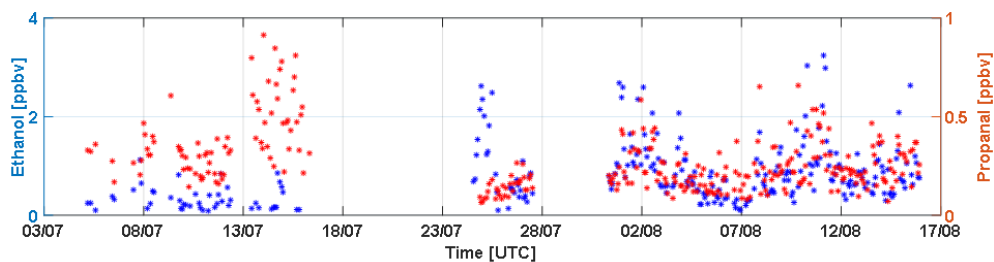

4

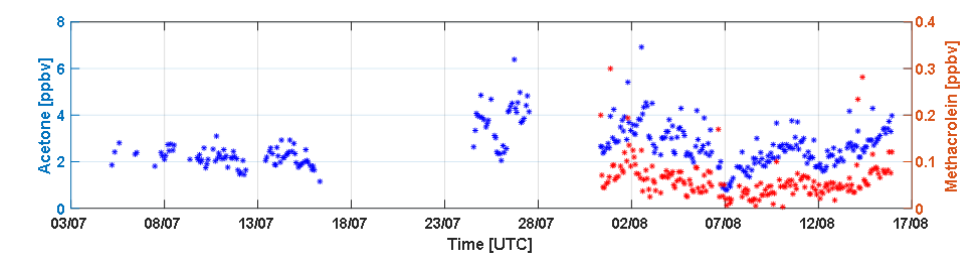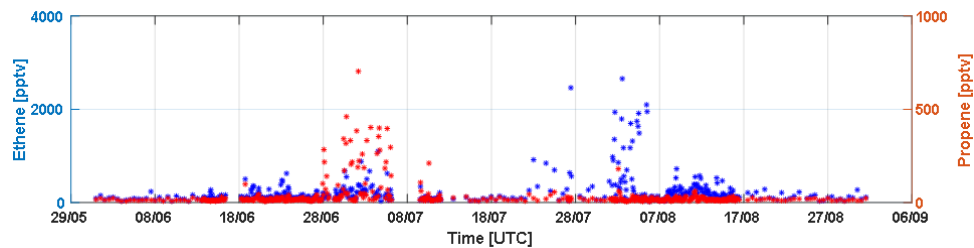

5 Figure SI-1, continued

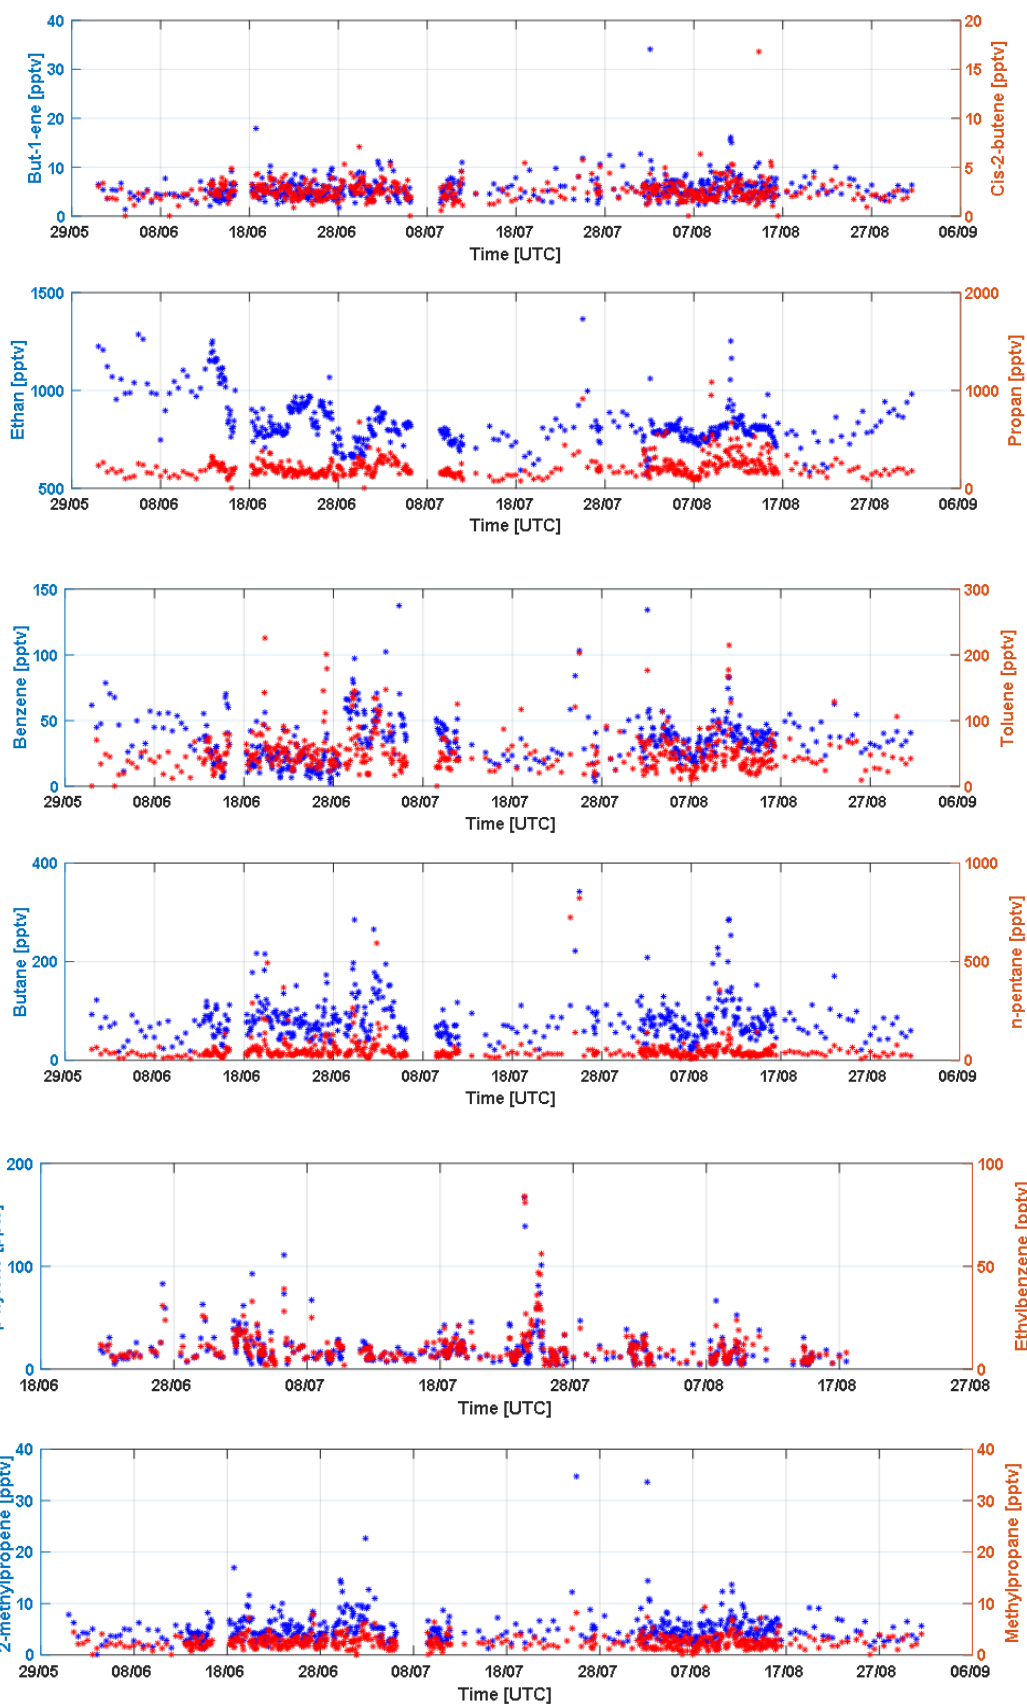

Figure SI-1, continued

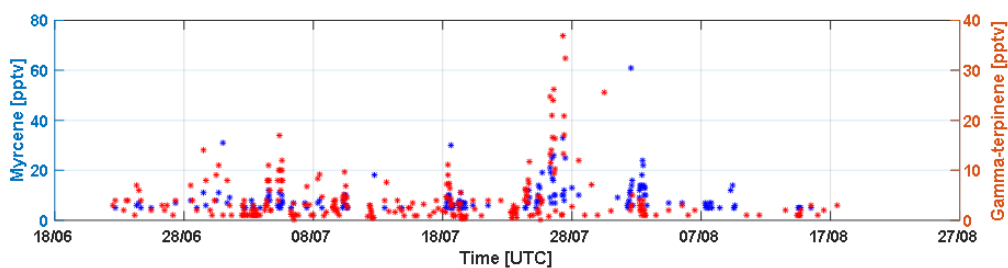

Figure SI-1, continued

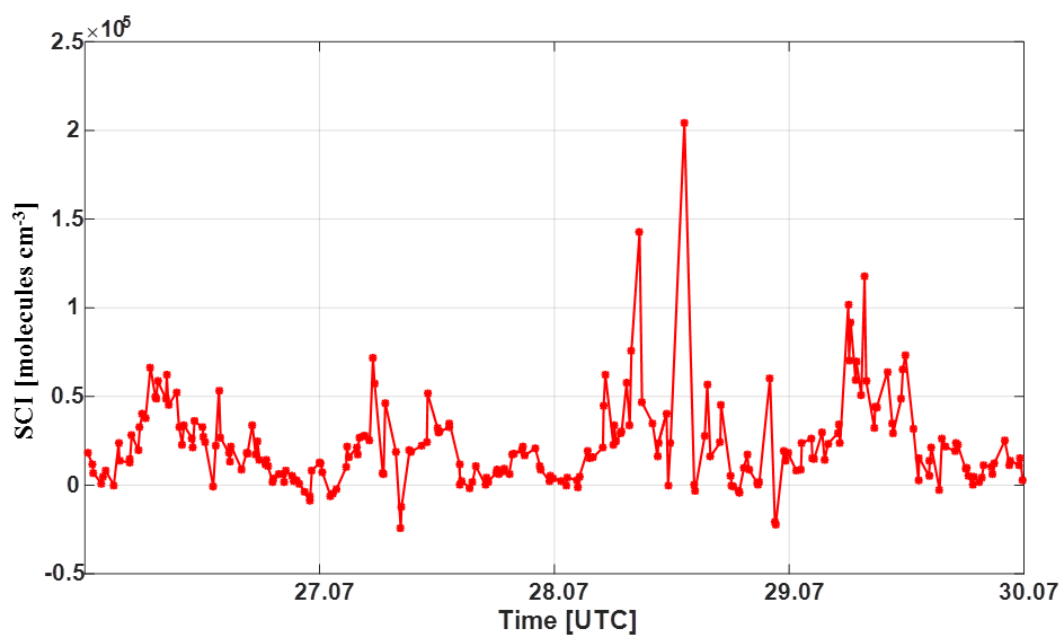

Figure SI-2. SCI time series as calculated from the sulfuric acid budget during the HUMPPA-COPEC 2010 campaign.

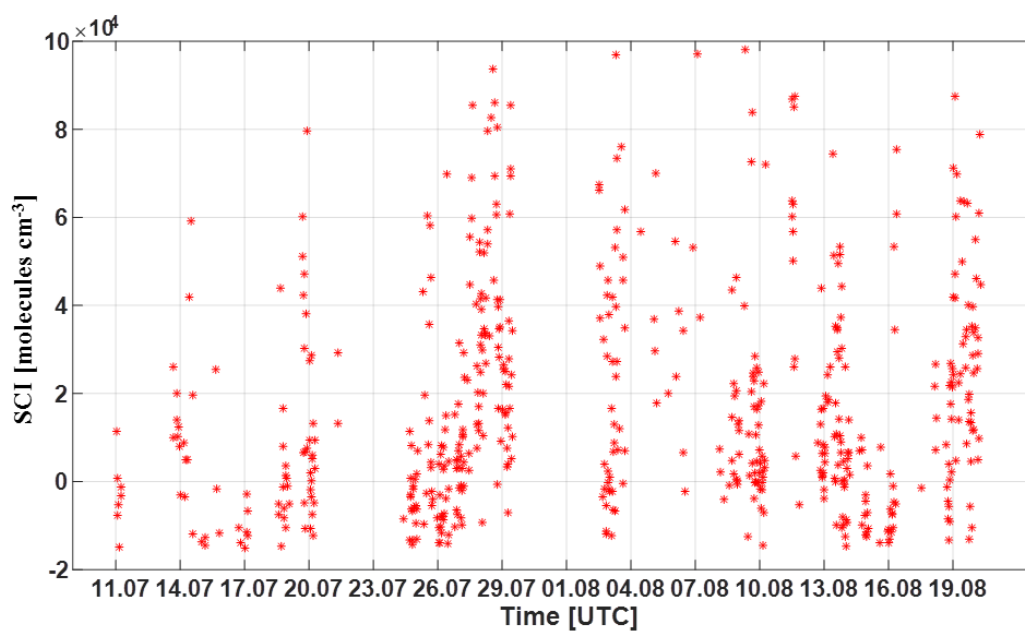

Figure SI-3. SCI time series as calculated from the sulfuric acid budget during the HOPE 2012 campaign.

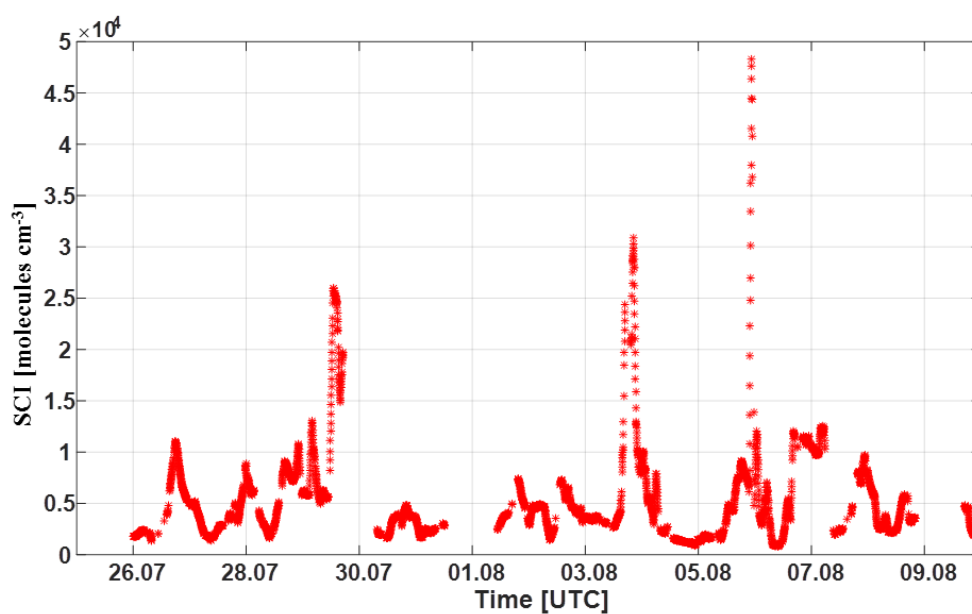

Figure SI-4. SCI time series as calculated from the measured unsaturated VOC during the HUMPPA-COPEC 2010 campaign.



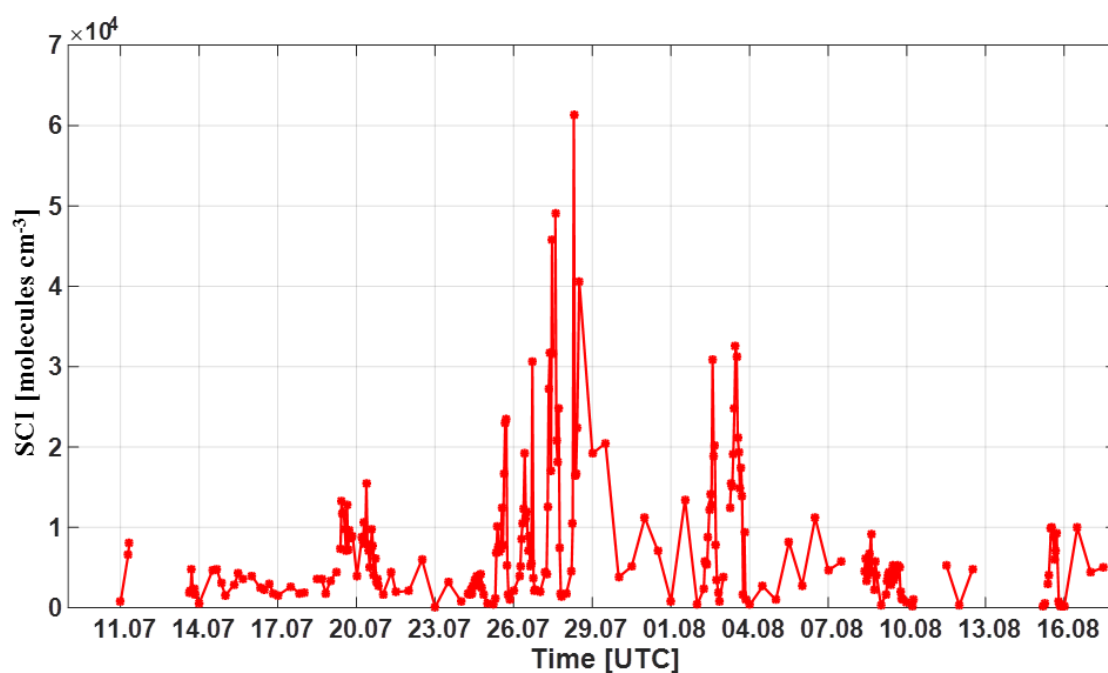

Figure SI-5. SCI time series as calculated from the measured unsaturated VOC during the HOPE 2012 campaign.

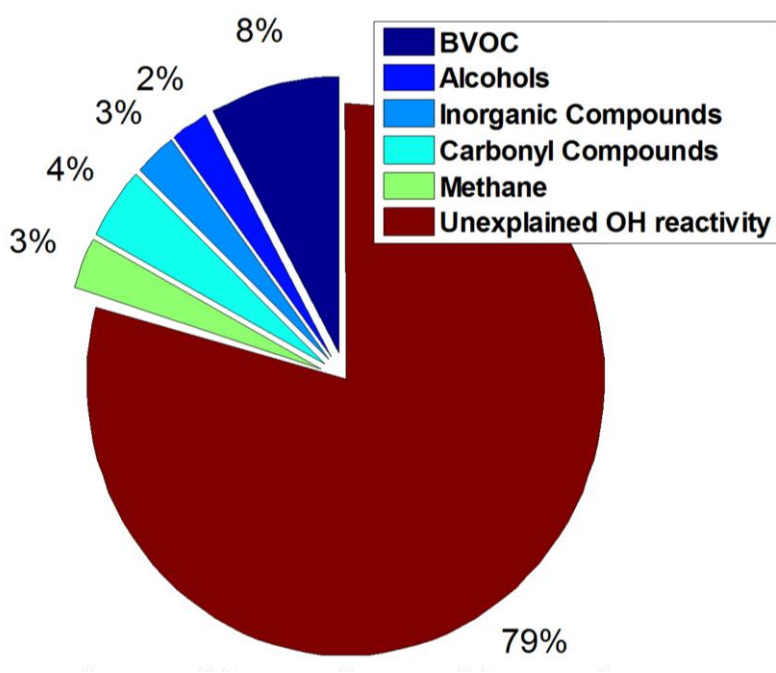

Figure SI-6. Contributions of measured trace gases to the measured OH reactivity during the HUMPPA-COPEC 2010.

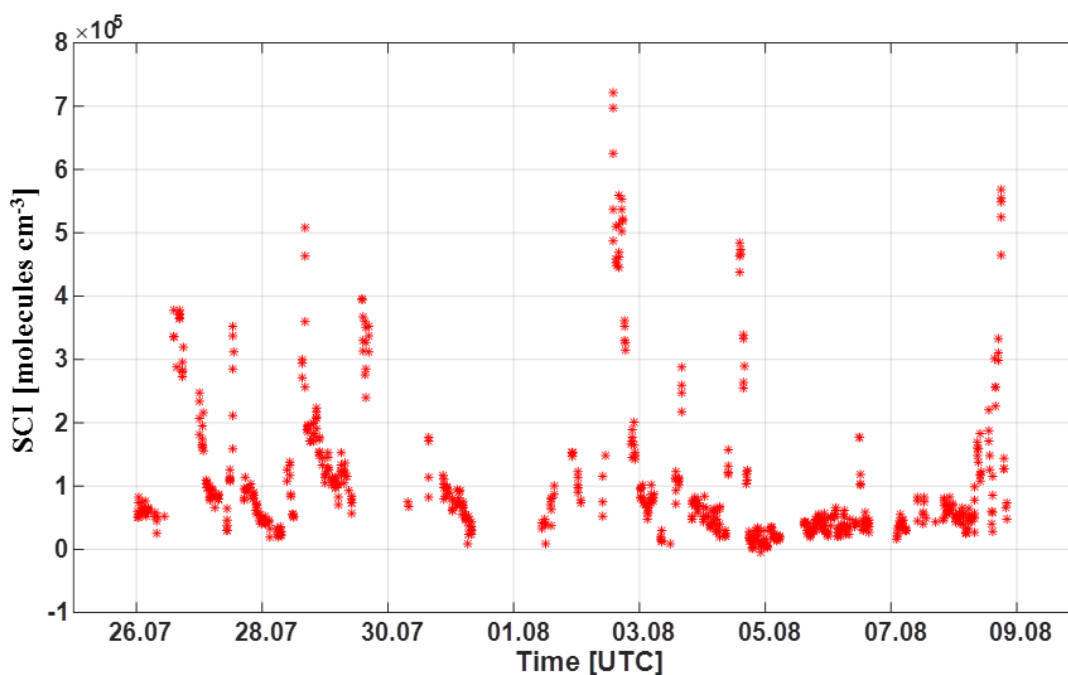

1  
2 Figure SI-7. SCI time series as calculated from the unexplained OH reactivity during the  
3 HUMPPA-COPEC 2010 campaign.

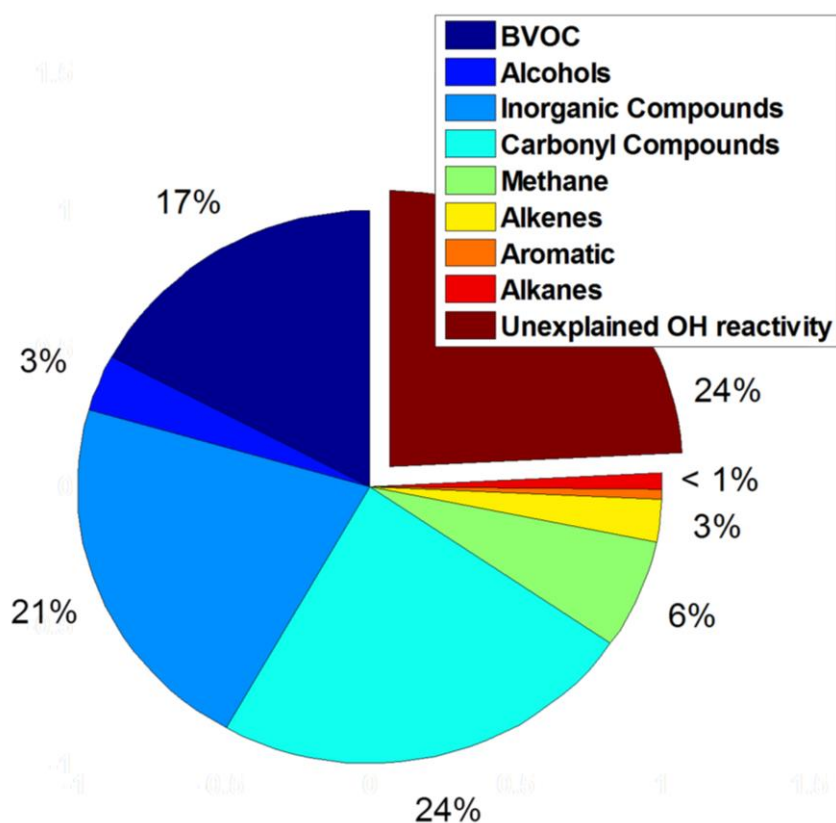

4  
5 Figure SI-8. Contributions of measured trace gases to the measured OH reactivity during the  
6 HOPE 2012.

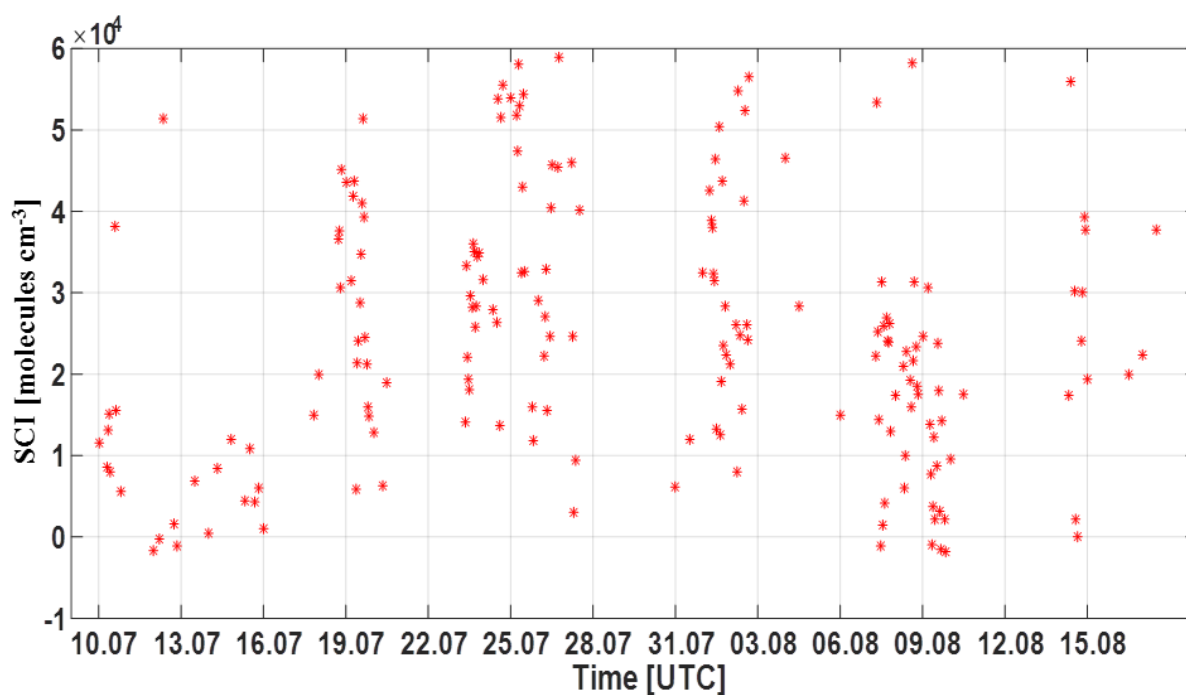

1  
2 Figure SI-9. SCI time series as calculated from the unexplained OH reactivity during the  
3 HOPE 2012 campaign.

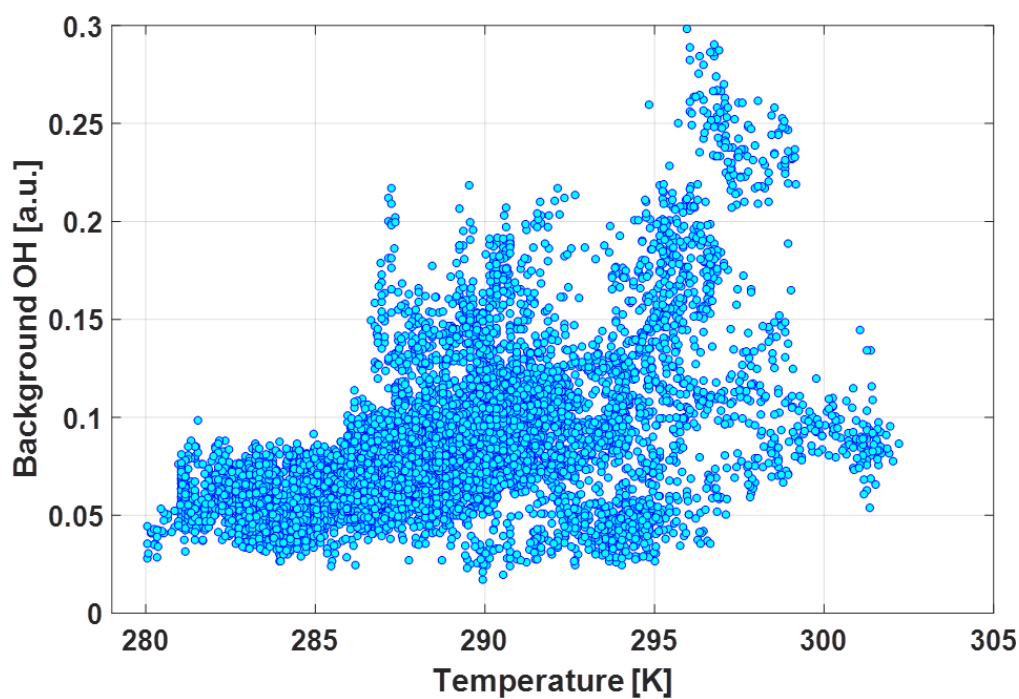

4  
5 Figure SI-10. Background OH as a function of temperature during the HOPE 2012 campaign.

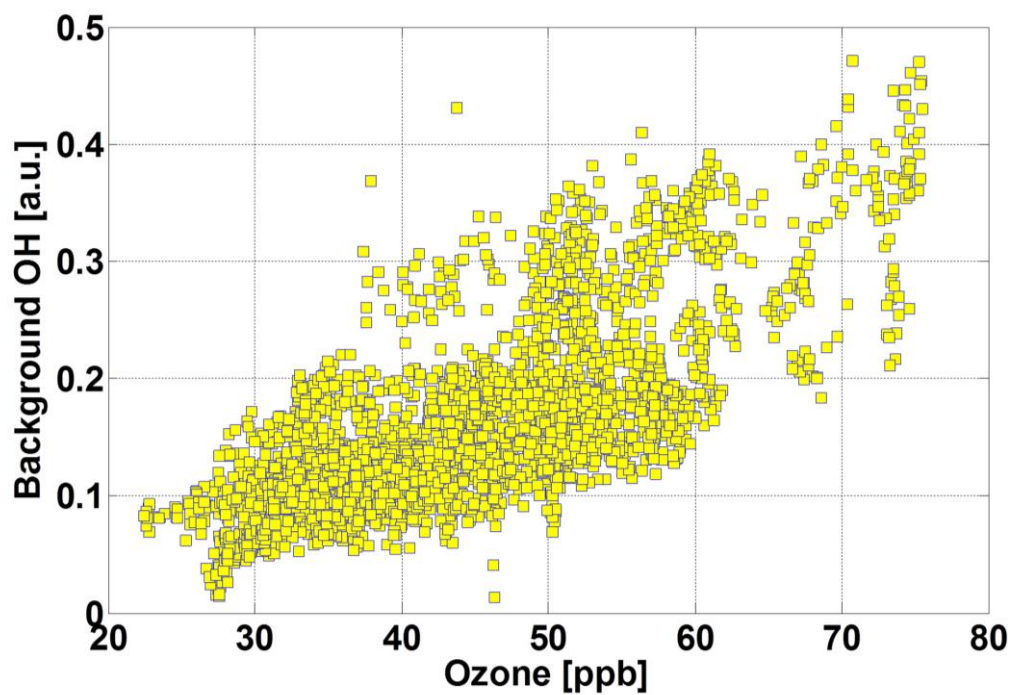

1  
2 Figure SI-11. Background OH as a function of the ozone concentration during the HUMPPA-  
3 COPEC 2010 campaign.

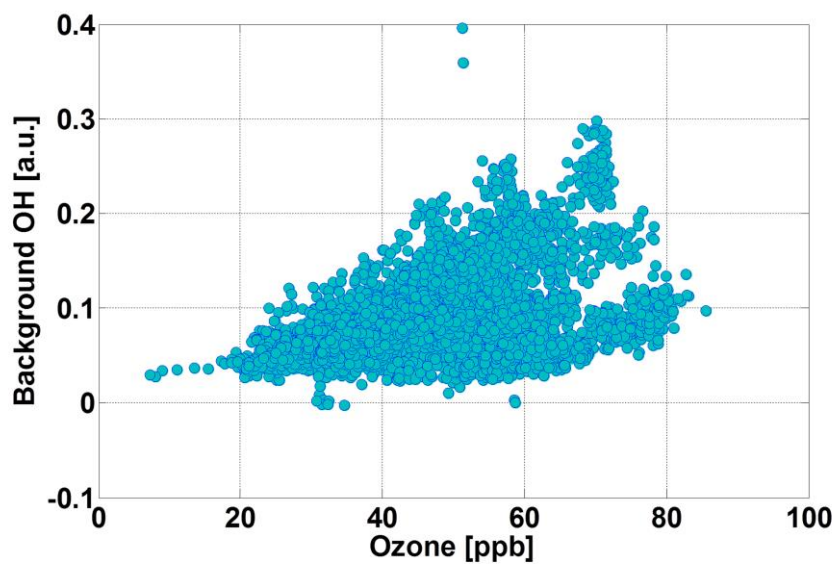

4  
5 Figure SI-12. Background OH signal as a function of ozone concentration during the HOPE  
6 2012 campaign.

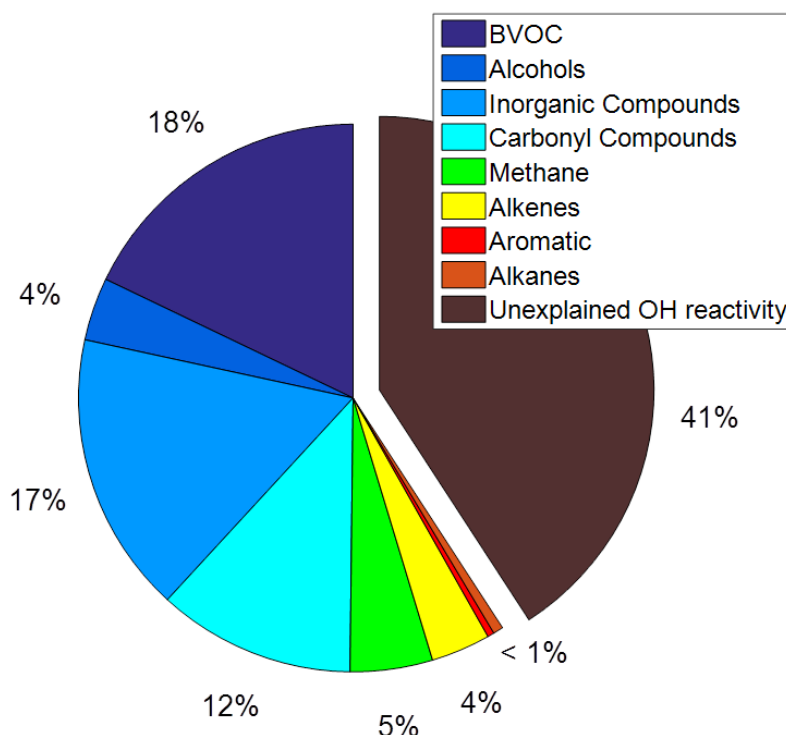

Figure SI-13. Contribution of measured trace gases to the measured OH reactivity during HOPE 2012 between the 1<sup>st</sup> and 3<sup>rd</sup> of August 2012.

## References

- Adeniji, S. A., Kerr, J. A., and Williams, M. R.: Rate constants for ozone–alkene reactions under atmospheric conditions, *Int J Chem Kinet*, 13, 209-217, 10.1002/kin.550130210, 1981.
- Ahrens, J., Carlsson, P. T., Hertl, N., Olzmann, M., Pfeifle, M., Wolf, J. L., and Zeuch, T.: Infrared detection of Criegee intermediates formed during the ozonolysis of beta-pinene and their reactivity towards sulfur dioxide, *Angew Chem Int Ed Engl*, 53, 715-719, 10.1002/anie.201307327, 2014.
- Atkinson, R., and Arey, J.: Atmospheric Degradation of Volatile Organic Compounds, *Chemical Reviews*, 103, 4605-4638, 10.1021/cr0206420, 2003.
- Atkinson, R., Baulch, D. L., Cox, R. A., Crowley, J. N., Hampson, R. F., Hynes, R. G., Jenkin, M. E., Rossi, M. J., and Troe, J.: Evaluated kinetic and photochemical data for atmospheric chemistry: Volume I - gas phase reactions of Ox, HOx, NOx and SOx species, *Atmos. Chem. Phys.*, 4, 1461-1738, 10.5194/acp-4-1461-2004, 2004.
- Atkinson, R., Baulch, D. L., Cox, R. A., Crowley, J. N., Hampson, R. F., Hynes, R. G., Jenkin, M. E., Rossi, M. J., Troe, J., and Subcommittee, I.: Evaluated kinetic and

1 photochemical data for atmospheric chemistry: Volume II - gas phase reactions of organic  
2 species, *Atmos. Chem. Phys.*, 6, 3625-4055, 10.5194/acp-6-3625-2006, 2006.

3 Berndt, T., Jokinen, T., Mauldin, R. L., Petaja, T., Herrmann, H., Junninen, H., Paasonen, P.,  
4 Worsnop, D. R., and Sipila, M.: Gas-Phase Ozonolysis of Selected Olefins: The Yield of  
5 Stabilized Criegee Intermediate and the Reactivity toward SO<sub>2</sub>, *J. Phys. Chem. Lett.*, 3, 2892-  
6 2896, 10.1021/jz301158u, 2012.

7 Berndt, T., Jokinen, T., Sipilä, M., Mauldin Iii, R. L., Herrmann, H., Stratmann, F., Junninen,  
8 H., and Kulmala, M.: H<sub>2</sub>SO<sub>4</sub> formation from the gas-phase reaction of stabilized Criegee  
9 Intermediates with SO<sub>2</sub>: Influence of water vapour content and temperature, *Atmos Environ*,  
10 89, 603-612, <http://dx.doi.org/10.1016/j.atmosenv.2014.02.062>, 2014.

11 Braure, T., Bedjanian, Y., Romanias, M. N., Morin, J., Riffault, V., Tomas, A., and  
12 Coddeville, P.: Experimental Study of the Reactions of Limonene with OH and OD Radicals:  
13 Kinetics and Products, *The Journal of Physical Chemistry A*, 118, 9482-9490,  
14 10.1021/jp507180g, 2014.

15 Buras, Z. J., Elsamra, R. M., Jalan, A., Middaugh, J. E., and Green, W. H.: Direct kinetic  
16 measurements of reactions between the simplest Criegee intermediate CH<sub>2</sub>OO and alkenes, *J*  
17 *Phys Chem A*, 118, 1997-2006, 10.1021/jp4118985, 2014.

18 Carlsson, P. T. M., Keunecke, C., Kruger, B. C., Maa, and Zeuch, T.: Sulfur dioxide oxidation  
19 induced mechanistic branching and particle formation during the ozonolysis of β-pinene and  
20 2-butene, *Phys Chem Chem Phys*, 14, 15637-15640, 2012.

21 Chhantyal-Pun, R., Davey, A., Shallcross, D. E., Percival, C. J., and Orr-Ewing, A. J.: A  
22 kinetic study of the CH<sub>2</sub>OO Criegee intermediate self-reaction, reaction with SO<sub>2</sub> and  
23 unimolecular reaction using cavity ring-down spectroscopy, *Phys Chem Chem Phys*,  
24 10.1039/c4cp04198d, 2015.

25 Chhantyal-Pun, R., Welz, O., Savee, J. D., Eskola, A. J., Lee, E. P. F., Blacker, L., Hill, H. R.,  
26 Ashcroft, M., Khan, M. A. H. H., Lloyd-Jones, G. C., Evans, L. A., Rotavera, B., Huang, H.,  
27 Osborn, D. L., Mok, D. K. W., Dyke, J. M., Shallcross, D. E., Percival, C. J., Orr-Ewing, A.  
28 J., and Taatjes, C. A.: Direct Measurements of Unimolecular and Bimolecular Reaction  
29 Kinetics of the Criegee Intermediate (CH<sub>3</sub>)<sub>2</sub>COO, *The Journal of Physical Chemistry A*,  
30 10.1021/acs.jpca.6b07810, 2016.

31 Donahue, N. M., Drozd, G. T., Epstein, S. A., Presto, A. A., and Kroll, J. H.: Adventures in  
32 ozoneland: down the rabbit-hole, *Phys Chem Chem Phys*, 13, 10848-10857,  
33 10.1039/c0cp02564j, 2011.

34 Foreman, E. S., Kapnas, K. M., and Murray, C.: Reactions between Criegee Intermediates and  
35 the Inorganic Acids HCl and HNO<sub>3</sub>: Kinetics and Atmospheric Implications, *Angewandte*  
36 *Chemie International Edition*, n/a-n/a, 10.1002/anie.201604662, 2016.

37 Hites, R. A., and Turner, A. M.: Rate constants for the gas-phase β-myrcene + OH and  
38 isoprene + OH reactions as a function of temperature, *Int J Chem Kinet*, 41, 407-413,  
39 10.1002/kin.20413, 2009.

40 Huang, H.-L., Chao, W., and Lin, J. J.-M.: Kinetics of a Criegee intermediate that would  
41 survive high humidity and may oxidize atmospheric SO<sub>2</sub>, *Proceedings of the National*  
42 *Academy of Sciences*, 10.1073/pnas.1513149112, 2015.

1 Jiang, L., Xu, Y.-s., and Ding, A.-z.: Reaction of Stabilized Criegee Intermediates from  
2 Ozonolysis of Limonene with Sulfur Dioxide: Ab Initio and DFT Study, *The Journal of*  
3 *Physical Chemistry A*, 114, 12452-12461, 10.1021/jp107783z, 2010.

4 Kurtén, T., Lane, J. R., Jørgensen, S., and Kjaergaard, H. G.: A Computational Study of the  
5 Oxidation of SO<sub>2</sub> to SO<sub>3</sub> by Gas-Phase Organic Oxidants, *The Journal of Physical Chemistry*  
6 *A*, 115, 8669-8681, 10.1021/jp203907d, 2011.

7 Kuwata, K. T., Guinn, E. J., Hermes, M. R., Fernandez, J. A., Mathison, J. M., and Huang,  
8 K.: A Computational Re-examination of the Criegee Intermediate–Sulfur Dioxide Reaction,  
9 *The Journal of Physical Chemistry A*, 119, 10316-10335, 10.1021/acs.jpca.5b06565, 2015.

10 Lewis, T. R., Blitz, M., Heard, D. E., and Seakins, P.: Direct evidence for a substantive  
11 reaction between the C1 Criegee radical, CH<sub>2</sub>OO, and the water vapour dimer, *Phys Chem*  
12 *Chem Phys*, 10.1039/c4cp04750h, 2015.

13 Liu, F., Beames, J. M., Green, A. M., and Lester, M. I.: UV spectroscopic characterization of  
14 dimethyl- and ethyl-substituted carbonyl oxides, *J Phys Chem A*, 118, 2298-2306,  
15 10.1021/jp412726z, 2014a.

16 Liu, Y., Bayes, K. D., and Sander, S. P.: Measuring rate constants for reactions of the simplest  
17 Criegee intermediate (CH<sub>2</sub>OO) by monitoring the OH radical, *J Phys Chem A*, 118, 741-747,  
18 10.1021/jp407058b, 2014b.

19 Mauldin III, R. L., Berndt, T., Sipila, M., Paasonen, P., Petaja, T., Kim, S., Kurten, T.,  
20 Stratmann, F., Kerminen, V. M., and Kulmala, M.: A new atmospherically relevant oxidant of  
21 sulphur dioxide, *Nature*, 488, 193-196,  
22 [http://www.nature.com/nature/journal/v488/n7410/abs/nature11278.html#supplementary-](http://www.nature.com/nature/journal/v488/n7410/abs/nature11278.html#supplementary-information)  
23 [information](http://www.nature.com/nature/journal/v488/n7410/abs/nature11278.html#supplementary-information), 2012.

24 Newland, M. J., Rickard, A. R., Alam, M. S., Vereecken, L., Munoz, A., Rodenas, M., and  
25 Bloss, W. J.: Kinetics of stabilised Criegee intermediates derived from alkene ozonolysis:  
26 reactions with SO<sub>2</sub>, H<sub>2</sub>O and decomposition under boundary layer conditions, *Phys Chem*  
27 *Chem Phys*, 10.1039/c4cp04186k, 2015a.

28 Newland, M. J., Rickard, A. R., Vereecken, L., Muñoz, A., Ródenas, M., and Bloss, W. J.:  
29 Atmospheric isoprene ozonolysis: impacts of stabilised Criegee intermediate reactions with  
30 SO<sub>2</sub>, H<sub>2</sub>O and dimethyl sulfide, *Atmos. Chem. Phys.*, 15, 9521-9536, 10.5194/acp-15-9521-  
31 2015, 2015b.

32 Novelli, A., Vereecken, L., Lelieveld, J., and Harder, H.: Direct observation of OH formation  
33 from stabilised Criegee intermediates, *Phys Chem Chem Phys*, 16, 19941-19951,  
34 10.1039/c4cp02719a, 2014.

35 Ouyang, B., McLeod, M. W., Jones, R. L., and Bloss, W. J.: NO<sub>3</sub> radical production from the  
36 reaction between the Criegee intermediate CH<sub>2</sub>OO and NO<sub>2</sub>, *Phys Chem Chem Phys*, 15,  
37 17070-17075, 10.1039/c3cp53024h, 2013.

38 Sheps, L., Scully, A. M., and Au, K.: UV absorption probing of the conformer-dependent  
39 reactivity of a Criegee intermediate CH<sub>3</sub>CHOO, *Phys Chem Chem Phys*,  
40 10.1039/c4cp04408h, 2014.

41 Stone, D., Blitz, M., Daubney, L., Howes, N. U., and Seakins, P.: Kinetics of CH<sub>2</sub>OO  
42 reactions with SO<sub>2</sub>, NO<sub>2</sub>, NO, H<sub>2</sub>O and CH<sub>3</sub>CHO as a function of pressure, *Phys Chem Chem*  
43 *Phys*, 16, 1139-1149, 10.1039/c3cp54391a, 2014.

- 1 Taatjes, C. A., Welz, O., Eskola, A. J., Savee, J. D., Scheer, A. M., Shallcross, D. E.,  
2 Rotavera, B., Lee, E. P., Dyke, J. M., Mok, D. K., Osborn, D. L., and Percival, C. J.: Direct  
3 measurements of conformer-dependent reactivity of the Criegee intermediate  $\text{CH}_3\text{CHOO}$ ,  
4 Science, 340, 177-180, 10.1126/science.1234689, 2013.
- 5 Teruel, M. A., Lane, S. I., Mellouki, A., Solignac, G., and Le Bras, G.: OH reaction rate  
6 constants and UV absorption cross-sections of unsaturated esters, Atmos Environ, 40, 3764-  
7 3772, <http://dx.doi.org/10.1016/j.atmosenv.2006.03.003>, 2006.
- 8 Vereecken, L., Harder, H., and Novelli, A.: The reaction of Criegee intermediates with NO,  
9  $\text{RO}_2$ , and  $\text{SO}_2$ , and their fate in the atmosphere, Phys Chem Chem Phys, 14, 14682-14695,  
10 10.1039/c2cp42300f, 2012.
- 11 Welz, O., Savee, J. D., Osborn, D. L., Vasu, S. S., Percival, C. J., Shallcross, D. E., and  
12 Taatjes, C. A.: Direct Kinetic Measurements of Criegee Intermediate ( $\text{CH}_2\text{OO}$ ) Formed by  
13 Reaction of  $\text{CH}_2\text{I}$  with  $\text{O}_2$ , Science, 335, 204-207, 10.1126/science.1213229, 2012.
- 14 Welz, O., Eskola, A. J., Sheps, L., Rotavera, B., Savee, J. D., Scheer, A. M., Osborn, D. L.,  
15 Lowe, D., Murray Booth, A., Xiao, P., Anwar H. Khan, M., Percival, C. J., Shallcross, D. E.,  
16 and Taatjes, C. A.: Rate Coefficients of C1 and C2 Criegee Intermediate Reactions with  
17 Formic and Acetic Acid Near the Collision Limit: Direct Kinetics Measurements and  
18 Atmospheric Implications, Angewandte Chemie, 126, 4635-4638, 10.1002/ange.201400964,  
19 2014.
- 20 Zhu, C., Kumar, M., Zhong, J., Li, L., Francisco, J. S., and Zeng, X. C.: New Mechanistic  
21 Pathways for Criegee–Water Chemistry at the Air/Water Interface, J Am Chem Soc,  
22 10.1021/jacs.6b04338, 2016.
